# Supplementary material for: Unveiling mirtron-triggered gene silencing mechanisms in soybean seed coat pigmentation
Source: Research Square preprint supplement (doi:10.21203/rs.3.rs-6817785/v1), 2025-06-27
Supplement: Supplementary file 1 [file 3693e41bfadf31c2e6659166.xlsx]

## Sheet: Sheet1
SupplementaryTable 1 | List of soybean cultivars.
Order	Name	Cultivar	Genotype	Seed coat color
1	BL01	Cheongja	i	black
2	BL02	Geomjeong3	i	black
3	BL03	Cheongja2	i	black
4	BL04	SLS B45	i	black
5	BL05	Geomjeongsaeol	i	black
6	BL06	Ilpumgeomjeong	i	black
7	BL07	Milyang79	i	black
8	BL08	Milyang70	i	black
9	BL09	Geomjeong4	i	black
10	BL10	Geomjeong2	i	black
11	BL11	Geomjeongol	i	black
12	BL12	Daeheuk	i	black
13	YL01	Doremi	ii	yellow
14	YL02	Daepung	ii	yellow
15	YL03	Sinpaldal	ii	yellow
16	YL04	Paldal	ii	yellow
17	YL05	Gnome85	ii	yellow
18	YL06	CNS	ii	yellow
19	YL07	Williams82	ii	yellow
20	YL08	Haman	ii	yellow
21	YL09	Dajang	ii	yellow
22	YL10	Ilmi	ii	yellow
23	YL11	Sinpaldal2	ii	yellow
24	YL12	Hwangkeum	I	yellow
25	BR01	PI475822C	ik	yellow mixed with brown
*PI475822C (BR01) has a brown colored seed coat with saddle pattern.
