# Supplementary material for: Unveiling mirtron-triggered gene silencing mechanisms in soybean seed coat pigmentation
Source: Research Square preprint supplement (doi:10.21203/rs.3.rs-6817785/v1), 2025-06-27
Supplement: Supplementary file 2 [file 2161c9914087b0c309e1dd60.pdf]

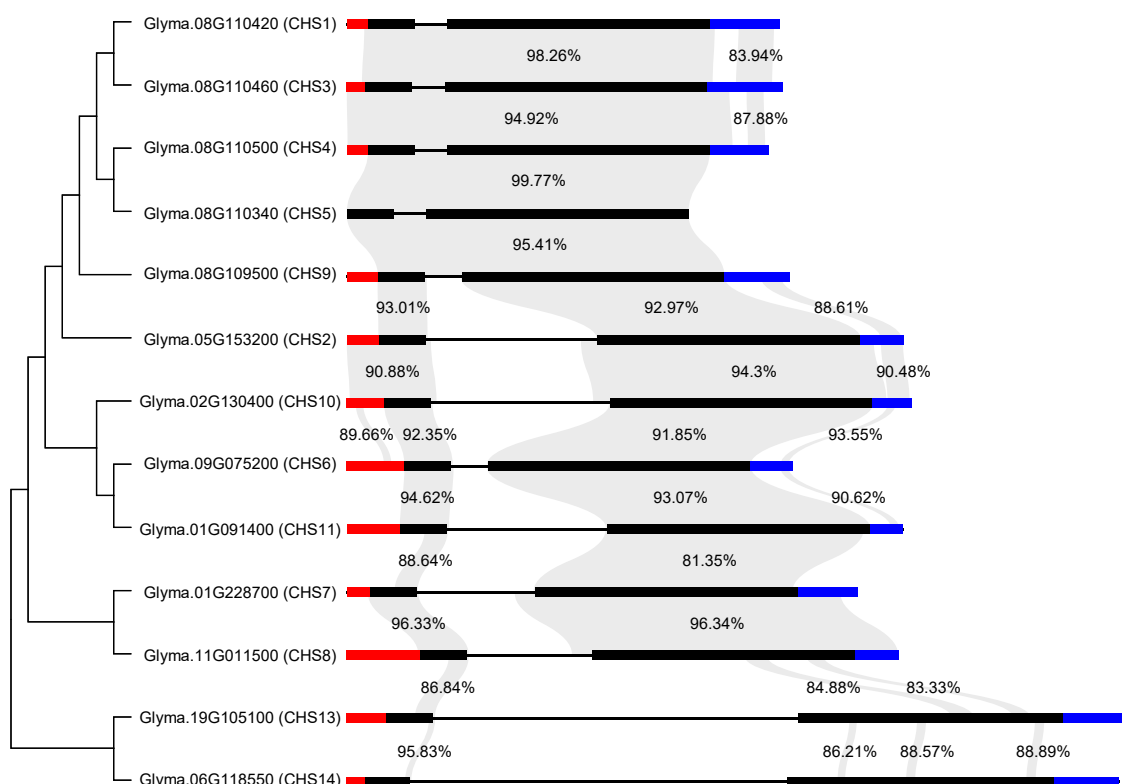

**Supplementary Figure 4 | Phylogeny of the GmCHS gene family.** Phylogenetic relationships were inferred from the sequence alignment of fourteen CHS genes. The red box indicates the 5'-untranslated region (5'-UTR), the thick black line represents exons, the thin black line denotes introns, the blue box marks the 3'-UTR, and the grey area highlights the aligned sequence regions.
