# Supplementary material for: Unveiling mirtron-triggered gene silencing mechanisms in soybean seed coat pigmentation
Source: Research Square preprint supplement (doi:10.21203/rs.3.rs-6817785/v1), 2025-06-27
Supplement: Supplementary file 2 [file 74459fb1311c6f1c6c3be8d3.xlsx]

## Sheet: Sheet1
Supplementary Table 2 | The primer informtation to amplify translocated region at the I locus.
Primer sequences (5'-3')	Forword	TGTAGAATTCCCTTCTGAAAGAGACTG
	Reverse	AATTTGGATTTGGATGAGATTGAGG
PCR product size (bp)	267
