# Supplementary material for: Unveiling mirtron-triggered gene silencing mechanisms in soybean seed coat pigmentation
Source: Research Square preprint supplement (doi:10.21203/rs.3.rs-6817785/v1), 2025-06-27
Supplement: Supplementary file 3 [file 54b5f89a2b2318a8cc2042ec.pdf]

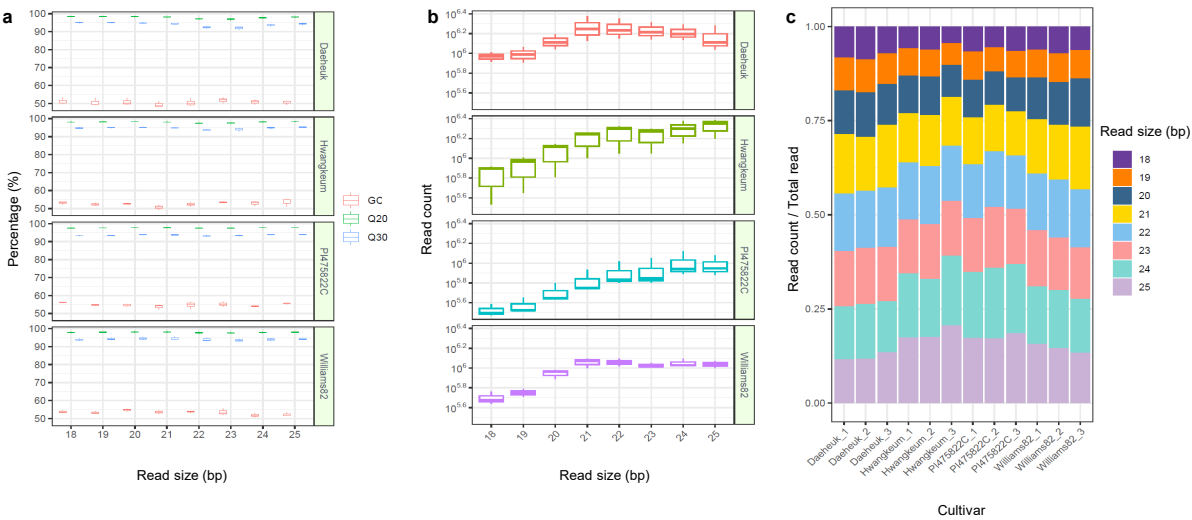

**Supplementary Figure 3 | Quality control and size classification of small RNA sequencing data.**

(a) Box plot showing the GC content, Q20, and Q30 scores for each sample. (b) Box plot displaying the amount of reads generated by small RNA sequencing. (c) Bar plot representing read distribution by size. Cultivars include Daeheuk (BL12), Hwangkeum (YL12), PI475822C (BR01), and Williams82 (YL07), corresponding to the  $i$ ,  $l$ ,  $i^k$ , and  $i^i$  alleles, respectively. Each cultivar was analyzed with three biological replicates.
