# Supplementary material for: Unveiling mirtron-triggered gene silencing mechanisms in soybean seed coat pigmentation
Source: Research Square preprint supplement (doi:10.21203/rs.3.rs-6817785/v1), 2025-06-27
Supplement: Supplementary file 3 [file 74c59842c9678427e4d1d26d.xlsx]

## Sheet: htseq_assignment_plot (1)
Supplementary Table 4 | The read counts which produced by small RNA sequencing.
Sample	Intragenic	Intergenic	Aligned	Not aligned
Daeheuk-1	161458596	1232255018	1398172780	9971816
Daeheuk-2	161871504	1285844413	1453587549	8972952
Daeheuk-3	202489311	1599049505	1807982335	10551288
PI475822C-1	99416766	981518788	1086857355	12383035
PI475822C-2	217759130	2113764042	2344939515	15457109
PI475822C-3	77742309	819522677	901610091	13490745
Williams82-1	306970967	2891251198	3218686068	14410621
Williams82-2	265267680	2392230551	2673582957	14797823
Williams82-3	167692446	1442079381	1619370528	16210355
Hwangkeum-1	276711158	2433427665	2724961134	18098064
Hwangkeum-2	280739504	2471889913	2764682611	14097668
Hwangkeum-3	145644052	1328185761	1481462686	14158853
Four samples with three biological replicates.
