# Supplementary material for: Unveiling mirtron-triggered gene silencing mechanisms in soybean seed coat pigmentation
Source: Research Square preprint supplement (doi:10.21203/rs.3.rs-6817785/v1), 2025-06-27
Supplement: Supplementary file 4 [file 6ca9d07a8f4f048fa2c9fea8.pdf]

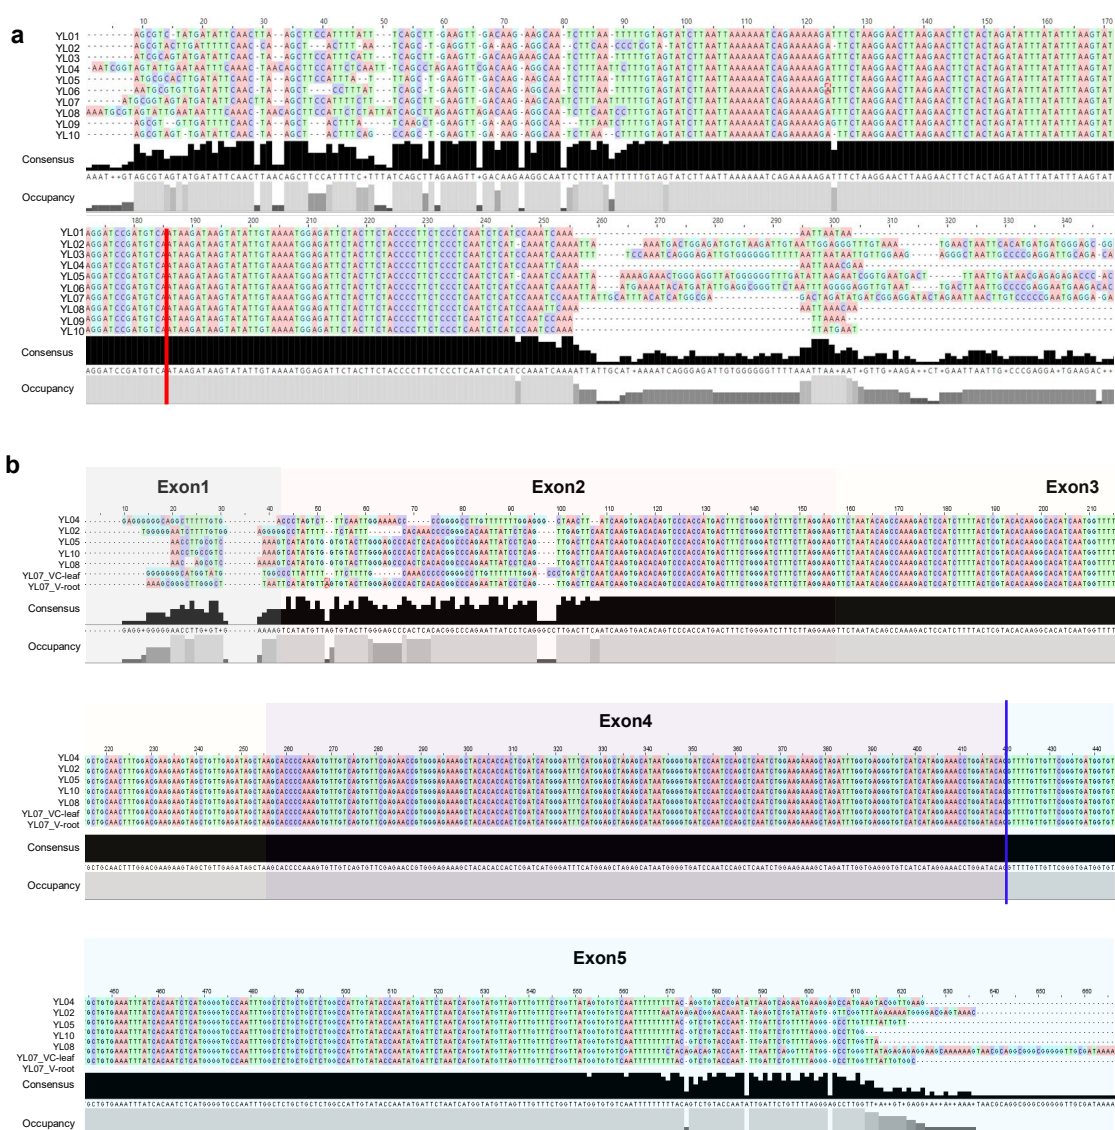

**Supplementary Figure 1 | Genomic DNA sequences of the translocated region and chimeric transcript in non-pigmented soybean with the  $i^l$  allele.** (a) Genomic DNA sequences showing the translocated region in cultivars with the  $i^l$  allele at the  $I$  locus. The vertical red line indicates the recombination site. (b) Sequences of the chimeric transcript from different cultivars with the  $i^i$  allele and different tissues (YL07). The vertical blue line marks the boundary between 4<sup>th</sup> and 5<sup>th</sup> exons. YL: yellow-colored soybean, VC: vegetative stage with unifoliate leaves, and V: vegetative stage with two or three trifoliate leaves. The numbers above each sequence lane indicate the positions.
