# Supplementary material for: Unveiling mirtron-triggered gene silencing mechanisms in soybean seed coat pigmentation
Source: Research Square preprint supplement (doi:10.21203/rs.3.rs-6817785/v1), 2025-06-27
Supplement: Supplementary file 4 [file d1ddd2c5f6ee2dc99fc07097.xlsx]

## Sheet: Sheet1
Supplementary Table 6 | The Primers to amplify fourteen CHS genes for quantitative real-time PCR.
Annotation	Locus ID	Product size (bp)	Forword sequence (5'-3')	Reverse sequence (5'-3')
CHS1/3	Glyma.08G110901	188	AACTGCGTGGATCAGAGTACC	AACGAAGGTGCCATGTAAGC
CHS2	Glyma.05G153200	197	AGTCAGAGGAAGGAAGCATGC	TCAACACTCACCATCCTAGATAGC
CHS4	Glyma.08G110701	199	CATATATGGCACCTTCGTTGG	CGAAGGCCTAATAGTTTAGTGAGC
CHS5	Glyma.08G110340	199	CATATATGGCACCTTCGTTGG	CGAAGGCCTAATAGTTTAGTGAGC
CHS6	Glyma.09G075200	200	AATAGAAAATGGACTTGGCACC	AAAAGAAGCATATAGAAAGACGGG
CHS7/8	Glyma.01G228700	195	AAACTGTTGTTTTGCATAGTGTGG	TGATAATTAGGCTAAAAAGCCACC
CHS9	Glyma.08G109500	201	CATTCTTTGGTGCAAGCTAGC	CAGTCATGTGCTCACTGTTGG
CHS10	Glyma.02G130400	189	CGATCTCCATCATCATATCATAGC	AATAGCCATCACGGTGGC
CHS11	Glyma.01G091400	207	GCACTGCATCTACTTACCTACCC	CTCTTCAACACTCACCATTTTCC
chimeric transcript	Glyma.08G110380	229	GAGGGTGTCATCATAGGAAACC	CACAATAAACCAAGGCCCC
