# Supplementary material for: Unveiling mirtron-triggered gene silencing mechanisms in soybean seed coat pigmentation
Source: Research Square preprint supplement (doi:10.21203/rs.3.rs-6817785/v1), 2025-06-27
Supplement: Supplementary file 5 [file 9ee707c5a4515675b0a3ae28.pdf]

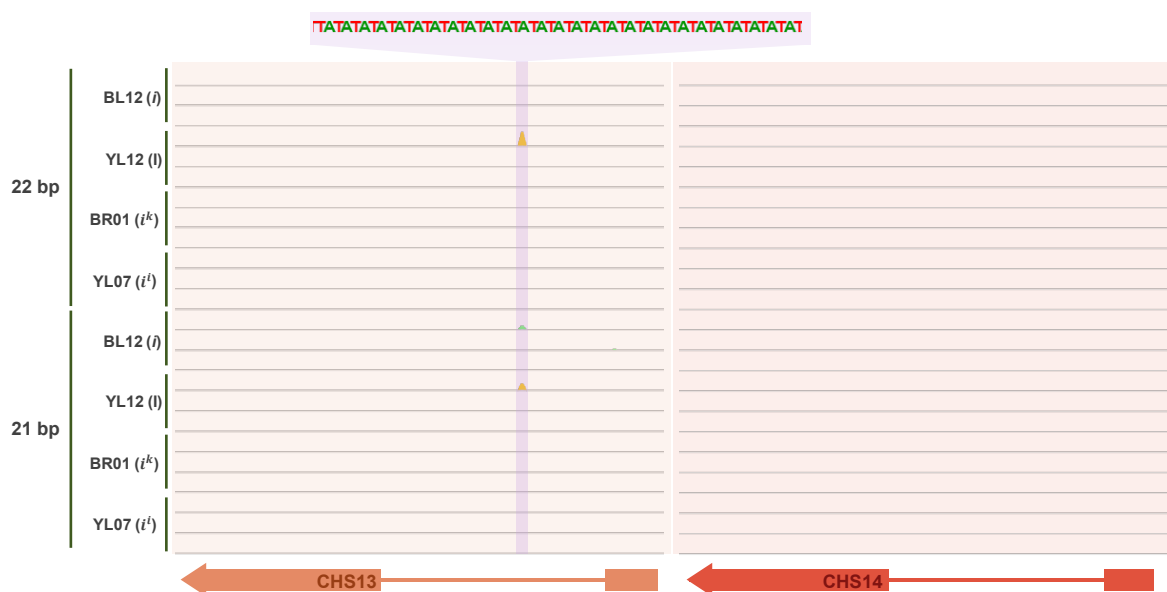

**Supplementary Figure 6 | Small RNA mapping at *CHS13* and *CHS14* based on the *I* locus allele with size categorization.** Small RNA reads were mapped to *CHS13* and *CHS14* according to the *I* locus allele, categorized by size into 22bp (primary miRNAs) and 21bp (secondary miRNAs). The sequence within the expanded purple box at the top provides a zoomed-in view of the region where small RNA reads are mapped within a portion of the *CHS13* intron. The scale represents 100 reads (height of each lane). Features beneath the lanes indicate *CHS13* and *CHS14* transcripts. CHS: chalcone synthase, BL: black-colored soybean, YL: yellow-colored soybean, and BR: brown-colored soybean with a saddle pattern.
