# Supplementary material for: Unveiling mirtron-triggered gene silencing mechanisms in soybean seed coat pigmentation
Source: Research Square preprint supplement (doi:10.21203/rs.3.rs-6817785/v1), 2025-06-27
Supplement: Supplementary file 5 [file d62a8768f3816e6534efee1e.xlsx]

## Sheet: Sheet1
Supplementary Table 3 | The primer informtation to amplify chimeric transcript.
Primer sequences (5'-3')	Forword	CTAGTCTGTCTATTGCACAGACCC
	Reverse	CACAATAAACCAAGGCCCC
PCR product size (bp)	613
