# Supplementary material for: Unveiling mirtron-triggered gene silencing mechanisms in soybean seed coat pigmentation
Source: Research Square preprint supplement (doi:10.21203/rs.3.rs-6817785/v1), 2025-06-27
Supplement: Supplementary file 6 [file ffaf520b8a3ea7c3f9b25ba5.xlsx]

## Sheet: Sheet1
Supplementary Table 5 | Position of CHS genes at Glycine max reference assembly version 2 and 4.
Annotation	Reference W82a2.v1.		Reference W82a4.v1.
	locus ID	position	locus ID	position	strand
GmCHS1	Glyma.08G109400	Chr08: 8391364..8394840	Glyma.08G109400	Chr08:8392372..8393660	+
GmCHS1	Glyma.08G109400	Chr08: 8391364..8394840	Glyma.08G110420	Chr08:8501125..8502413	-
GmCHS1	Glyma.08G109400	Chr08: 8391364..8394840	Glyma.08G110901	Chr08:8525504..8526792	+
GmCHS2	Glyma.05G153200	Chr05: 34687009..34693243	Glyma.05G153200	Chr05:34730537..34731840	+
GmCHS3	Glyma.08G109300,Glyma.08G110900,Glyma.08G110300	Chr08: 8387509..8391327,Chr08: 8517799..8519303,Chr08:8475793..8477410	Glyma.08G109300	Chr08:8388817-8390105	-
GmCHS3	Glyma.08G109300,Glyma.08G110900,Glyma.08G110300	Chr08: 8387509..8391327,Chr08: 8517799..8519303,Chr08:8475793..8477410	Glyma.08G110300	Chr08:8476041-8477329	+
GmCHS3	Glyma.08G109300,Glyma.08G110900,Glyma.08G110300	Chr08: 8387509..8391327,Chr08: 8517799..8519303,Chr08:8475793..8477410	Glyma.08G110460	Chr08:8504680-8505968	+
GmCHS3	Glyma.08G109300,Glyma.08G110900,Glyma.08G110300	Chr08: 8387509..8391327,Chr08: 8517799..8519303,Chr08:8475793..8477410	Glyma.08G110801	Chr08:8521949-8523237	-
GmCHS4	Glyma.08G110700,Glyma.08G110500	Chr08: 8513952..8515719,Chr08: 8504479..8506020	Glyma.08G110701	Chr08:8517978-8519265	+
GmCHS4	Glyma.08G110700,Glyma.08G110501	Chr08: 8513952..8515719,Chr08: 8504479..8506021	Glyma.08G110500	Chr08:8508653-8509940	-
GmCHS5	Glyma.08G109200	Chr08: 8384742..8386542	Glyma.08G109200	Chr08:8384845-8386132	+
GmCHS5	Glyma.08G109200	Chr08: 8384742..8386542	Glyma.08G110340	Chr08:8480014-8481301	-
GmCHS6	Glyma.09G075200	Chr09: 8145494..8147595	Glyma.09G075200	Chr09:8103591-8105404	-
GmCHS7	Glyma.01G228700	Chr01: 55659010..55660950	Glyma.01G228700	Chr01:56759180-56760794	+
GmCHS8	Glyma.11G011500	Chr11: 802453..804663	Glyma.11G011500	Chr11:797584-799224	+
GmCHS9	Glyma.08G109500	Chr08: 8397944..8399751	Glyma.08G109500	Chr08:8398184-8399489	+
GmCHS10	Glyma.02G130400	Chr02: 13399253..13401493	Glyma.02G130400	Chr02:13119907-13121746	+
GmCHS11	Glyma.01G091400	Chr01: 27621455..27623628	Glyma.01G091400	Chr01:27679737-27681505	-
GmCHS12	Glyma.08G110400	Chr08: 8478834..8480215	Pseudo	Pseudo
GmCHS13	Glyma.19G105100	Chr19: 35466392..35469297	Glyma.19G105100	Chr19:35941780-35944330	-
GmCHS14	Glyma.06G118500	Chr06: 9644661..9650144	Glyma.06G118500	Chr06:9614744-9617336	-
The Green colored boxes indicate CHS gene information which located at the I locus.
CHS12 is a pseudogene.
