# Supplementary figures and images for: Unveiling mirtron-triggered gene silencing mechanisms in soybean seed coat pigmentation
Source: Research Square preprint supplement (doi:10.21203/rs.3.rs-6817785/v1), 2025-06-27

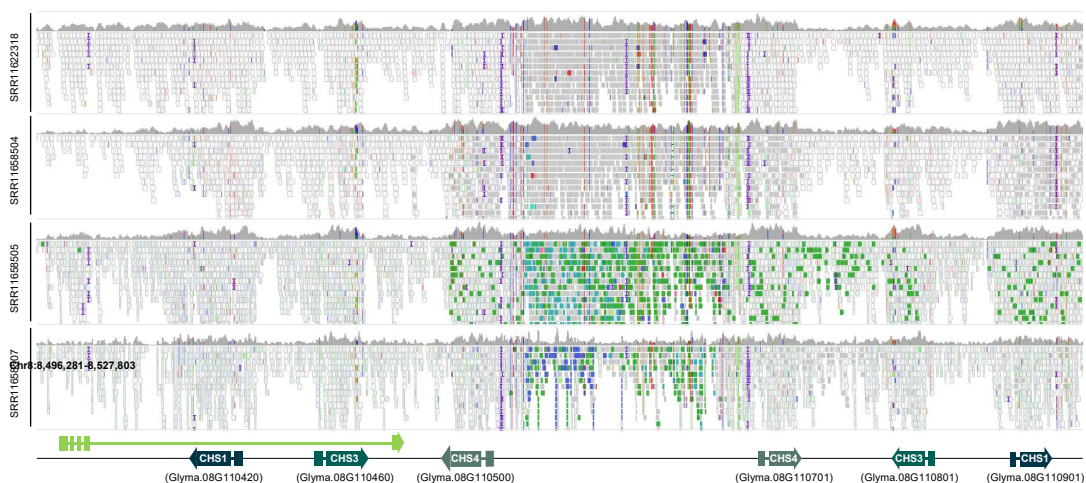

Supplement: Supplementary file 1 [file 0634f5f17bbe369958c0875d.pdf]
